# A hypothesis for theta rhythm frequency control in CA1 microcircuits

Frances K Skinner<sup>1,2,3\*</sup>, Scott Rich<sup>1</sup>, Anton R Lunyov<sup>1</sup>, Jeremie Lefebvre<sup>1</sup>,  
and Alexandra P Chatzikalymniou<sup>1,3</sup>

<sup>1</sup>*Krembil Brain Institute - Division of Clinical and Computational Neuroscience, Krembil Research Institute, University Health Network, Toronto, Ontario, Canada*

<sup>2</sup>*Department of Medicine (Neurology), University of Toronto, Toronto, Ontario, Canada*

<sup>3</sup>*Department of Physiology, University of Toronto, Toronto, Ontario, Canada*

Correspondence\*:  
Corresponding Author  
[frances.skinner@gmail.com](mailto:frances.skinner@gmail.com)

## 2 ABSTRACT

3 Computational models of neural circuits with varying levels of biophysical detail have been  
4 generated in pursuit of an underlying mechanism explaining the ubiquitous hippocampal theta  
5 rhythm. However, within the theta rhythm are at least two types with distinct frequencies associated  
6 with different behavioural states, an aspect that must be considered in pursuit of these mechanistic  
7 explanations. Here, using our previously developed excitatory-inhibitory network models that  
8 generate theta rhythms, we investigate the robustness of theta generation to intrinsic neuronal  
9 variability by building a database of heterogeneous excitatory cells and implementing them in our  
10 microcircuit model. We specifically investigate the impact of three key 'building block' features  
11 of the excitatory cell model that underlie our model design: these cells' rheobase, their capacity  
12 for post-inhibitory rebound, and their spike-frequency adaptation. We show that theta rhythms at  
13 various frequencies can arise dependent upon the combination of these building block features,  
14 and we find that the speed of these oscillations are dependent upon the excitatory cells' response  
15 to inhibitory drive, as encapsulated by their phase response curves. Taken together, these  
16 findings support a hypothesis for theta frequency control that includes two aspects: (i) an internal  
17 mechanism that stems from the building block features of excitatory cell dynamics; (ii) an external  
18 mechanism that we describe as 'inhibition-based tuning' of excitatory cell firing. We propose that  
19 these mechanisms control theta rhythm frequencies and underlie their robustness.

20 **Keywords:** theta rhythm, theta oscillations, hippocampus, inhibition, network, microcircuit models

## 1 INTRODUCTION

21 Hippocampal theta rhythms ( $\approx$  3-12 Hz) observed in local field potential (LFP) recordings are associated  
22 with cognitive processes of memory formation and spatial navigation (Colgin, 2013, 2016; Hinman et al.,  
23 2018). Exactly how theta rhythms emerge is a complicated and multi-layered problem, but it is known  
24 that there are two types, denoted type 1 and type 2, that have high (7-12 Hz) or low (4-7 Hz) frequencies  
25 respectively. Type 2, but not type 1, rhythms are dependent on cholinergic drive (Bland, 1986; Buzsáki,  
26 2002; Kramis et al., 1975). In rodents, it has been shown that social stimuli elicit high theta, and fearful

27 stimuli elicit low theta (Tendler and Wagner, 2015), and type 2 theta oscillations have been shown to be  
28 associated with increased risk-taking behaviour (Mikulovic et al., 2018). In humans, theta frequencies are  
29 lower overall (Jacobs, 2014), but it is still possible to distinguish high and low theta frequencies, with low  
30 theta supporting encoding and retrieval of memories (Kota et al., 2020). Clearly, theta frequency control is  
31 functionally important.

32 It is now well-documented that theta rhythms can be generated intra-hippocampally, emerging  
33 spontaneously from an isolated whole hippocampus preparation *in vitro* (Goutagny et al., 2009).  
34 Simultaneous access to cellular and population output presents an opportunity to untangle cellular and  
35 population dynamics of how theta rhythms are generated. In previous work, we took advantage of this  
36 and built cellular and microcircuit models that could generate theta rhythms with parameters directly  
37 constrained by experimental data from the whole hippocampus preparation and the experimental literature  
38 (Ferguson et al., 2013, 2015a, 2017). Motivated by the perspective presented by Gjorgjieva et al. (2016),  
39 we considered a ‘building blocks for circuit dynamics’ analysis approach in our microcircuit model  
40 design (Ferguson et al., 2017). In this perspective, biologically known cellular, synaptic and connectivity  
41 characteristics are considered as building blocks for circuit dynamics. For example, one such cellular  
42 ‘building block’ is post-inhibitory rebound (PIR), which has previously been invoked as a contributor to the  
43 generation of cortical oscillations (McCormick et al., 2015).

44 In this paper we use our theta-generating microcircuit model to develop a hypothesis of how the theta  
45 frequencies could be controlled. We first describe the model microcircuit design and then assess the  
46 robustness of theta generation in the model by considering heterogeneous pyramidal (PYR) cell populations.  
47 From this, we use phase response curves (PRCs) and show that inhibitory inputs affect the theta frequency.  
48 We thus propose a hypothesis for theta frequency control in CA1 microcircuits that is dependent on  
49 internal features of PYR cells and ‘inhibition-based tuning’ of PYR cell firing. We summarize our study in  
50 schematic form in **Fig 1**.

## 2 A DESIGN OF MICROCIRCUIT MODELS THAT PRODUCE THETA RHYTHMS

51 We have built cellular-based excitatory-inhibitory (E-I) network models (Ferguson et al., 2017) to  
52 understand how the intrinsic theta rhythms observed in a whole hippocampus preparation by Goutagny  
53 et al. (2009) could be generated. The model networks (see **Fig 1** schematic) are designed to represent  
54 a ‘piece’ of the CA1 region of the hippocampus - approximately one mm<sup>3</sup> that was determined to be  
55 enough to self-generate theta rhythms. It includes only two distinct cell types, pyramidal (PYR) cells  
56 and fast-firing parvalbumin-positive (PV+) cells, as represented by a single compartment model with an  
57 Izhikevich mathematical model structure (Izhikevich, 2006). The model network consists of 10,500 cells  
58 (10,000 PYR cells and 500 fast-firing PV+ cells) (Ferguson et al., 2013, 2015b). We note that we have taken  
59 advantage of a scaling relationship between cell number, connection probability and excitatory synaptic  
60 weight that allowed us to use 10,000 PYR cells rather than the 30,000 cell number size as estimated for the  
61 ‘piece’ of tissue.

62 We examined our models from a ‘building block for circuit dynamics’ perspective (Gjorgjieva et al.,  
63 2016) to determine if theta rhythms (i.e., theta frequency population bursts) could be generated according to  
64 experimental constraints. We first found that experimentally constrained PYR cell network models (E-cell  
65 networks alone) could generate population bursts of theta frequency (Ferguson et al., 2015b), suggesting  
66 that a cellular ‘building block’ feature of spike frequency adaptation (SFA) present in the constrained  
67 PYR cell models could be an important contributor to theta rhythm generation. However, we also found  
68 that in these E-cell only networks the PYR cells do not fire sparsely as was observed experimentally

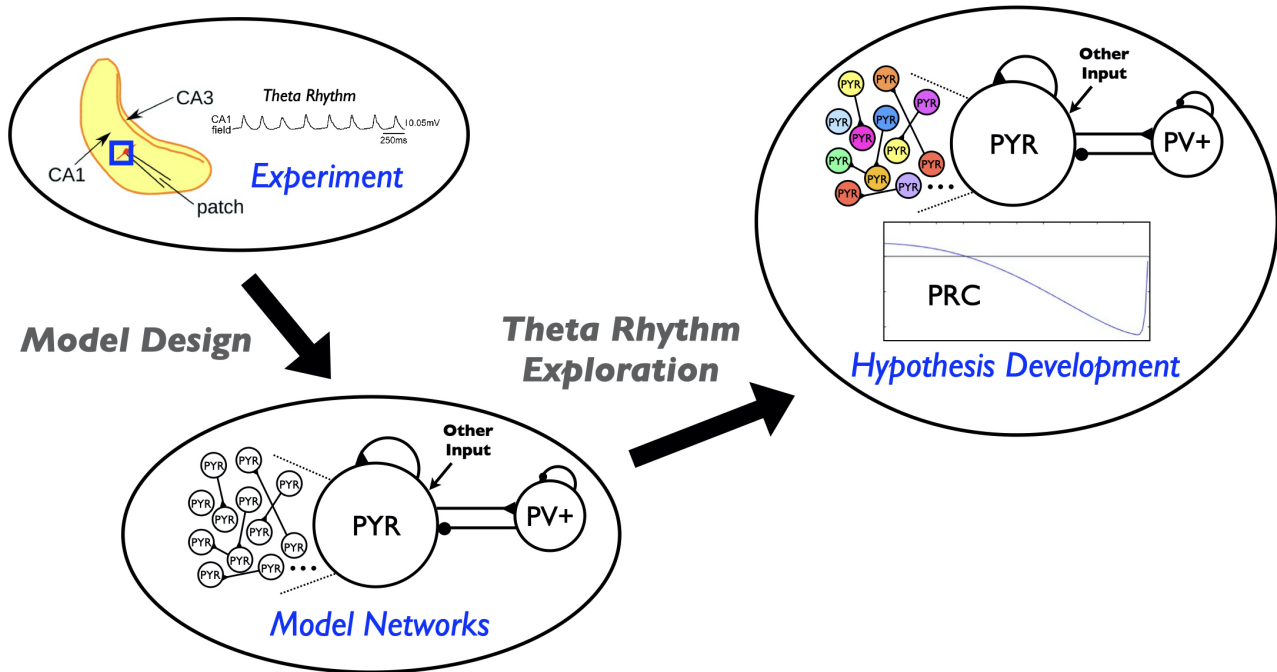

**Figure 1. Schematic showing aspects involved in the hypothesis developed in this study.**

Theta rhythms are generated intrinsically in a whole hippocampus preparation of Goutagny et al. (2009) ('Experiment'). Their generation is captured in a microcircuit model design by Ferguson et al. (2017) ('Model Networks'). In the present paper we assess the robustness of this model design and develop a hypothesis for theta frequency control ('Hypothesis Development').

69 (Huh et al., 2016). When we included PV+ cells to create E-I model networks, population bursts of theta  
70 frequency were still possible and were now associated with sparse PYR cell firing in accordance with the  
71 experimental data. As the addition of PV+ cells allows PIR to be possible in the PYR cells, we consider  
72 PIR as another building block feature of importance in generating these intrinsic theta rhythms. Along with  
73 SFA and PIR features, the PYR neurons have an inherent rheobase (Rheo) feature, which is the amount of  
74 current required to make the PYR cell spike (derived from fitting to the experimental data in Ferguson et al.  
75 (2015a)). We consider this to be a third building block feature for theta rhythm generation. Further, for the  
76 model output to be consistent with experimental observations of excitatory postsynaptic current (EPSC)  
77 and inhibitory postsynaptic current (IPSC) amplitude ratios, we found that the connection probability from  
78 PV+ to PYR cells was required to be larger than from PYR to PV+ cells - a particular prediction that has  
79 been examined and found to be consistent with empirically derived connectivities (Chatzikalymniou et al.,  
80 2020).

### 3 AN ASSESSMENT OF THE MODEL DESIGN FOR ROBUST THETA RHYTHMS

81 In our previous work, we did not specifically examine the sensitivity of theta rhythms to SFA, PIR or Rheo  
82 features. To address this here, we create a model database of 10,000 PYR cell models. While there are  
83 various ways in which a model database could be created, we do this by simply varying specific parameter  
84 values of the PYR cell model in a regular fashion. The PYR cell model parameter values determined from  
85 fits to the experimental data (Ferguson et al., 2015a) are considered as 'default' values. Details for the  
86 model database creation are provided in the Appendix of the Supplementary Material.

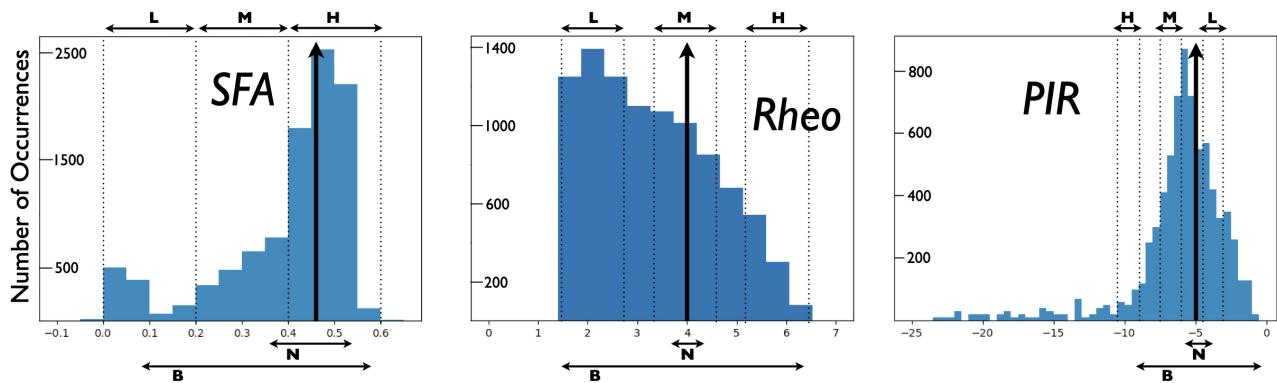

**Figure 2. Distributions of PYR cell features from created model database.**

A heterogeneous set of PYR cells was created and their ‘building block’ features of SFA, Rheo and PIR were quantified. Details of this quantification are provided in the Appendix of the Supplementary Material. Histograms show the number of occurrences of SFA [=] Hz/pA, Rheo [=] pA, PIR [=] pA values, and vertical black arrows indicate [SFA,Rheo,PIR] base values. Also shown are narrow (N) and broad (B) subsets of heterogeneous PYR cell populations and low (L), medium (M) or high (H) subsets of heterogeneous PYR cell populations that do or do not include base building block values. SFA histogram has a bin resolution of 0.05, and Rheo, PIR histograms have a bin resolution of 0.5.

87 From the created model database of PYR cell models, we obtain varied SFA, PIR and Rheo features.  
88 We define SFA, PIR and Rheo feature quantifications in the following fashion: the larger the quantified  
89 SFA value is, the stronger is the amount of the PYR cell adaptation, i.e., we get more reduction in the  
90 PYR cell spike frequency for a fixed amount of input current; the more negative the quantified PIR  
91 value is, the larger is the hyperpolarizing step required to generate a spike at the end of the step; the larger the  
92 quantified Rheo value is, the more input is required to cause the cell to spike. Details are provided in the  
93 Appendix of the Supplementary Material. For the PYR cell model with default parameter values as used in  
94 Ferguson et al. (2017), the quantified values for the building block features are: SFA = 0.46 Hz/pA, Rheo =  
95 4.0 pA, and PIR = -5.0 pA. We refer to these as ‘base’ values. Here, with a created database of PYR cell  
96 models, we obtain a range of building block feature values distributed as shown in **Fig 2**. Further details  
97 are provided in the Appendix of the Supplementary Material.

98 In the extensive E-I network simulations of Ferguson et al. (2017), the PYR cell models used were  
99 homogeneous, and all had default model parameter values. However, the networks themselves were not  
100 homogeneous because of the noisy external drives to the PYR cell models. To examine the robustness of  
101 the theta-generating mechanism in the E-I network models to variability in the SFA, PIR and Rheo features,  
102 we create heterogeneous PYR cell populations from the model database and examine whether the presence  
103 of theta rhythms in E-I networks is affected by varying these building block features.

104 We carry out our examination such that the heterogeneous PYR cell population in the E-I networks either  
105 does or does not include PYR cells that have base values. As a brief aside, we note that when we examine  
106 E-I networks that have homogeneous PYR cell models with parameter values different from the default  
107 ones, but that have similar SFA, PIR and Rheo base values, the resulting networks produce clear population  
108 bursts, but with a bit of variation in frequency and power. Specific examples are provided in the Appendix  
109 of the Supplementary Material.

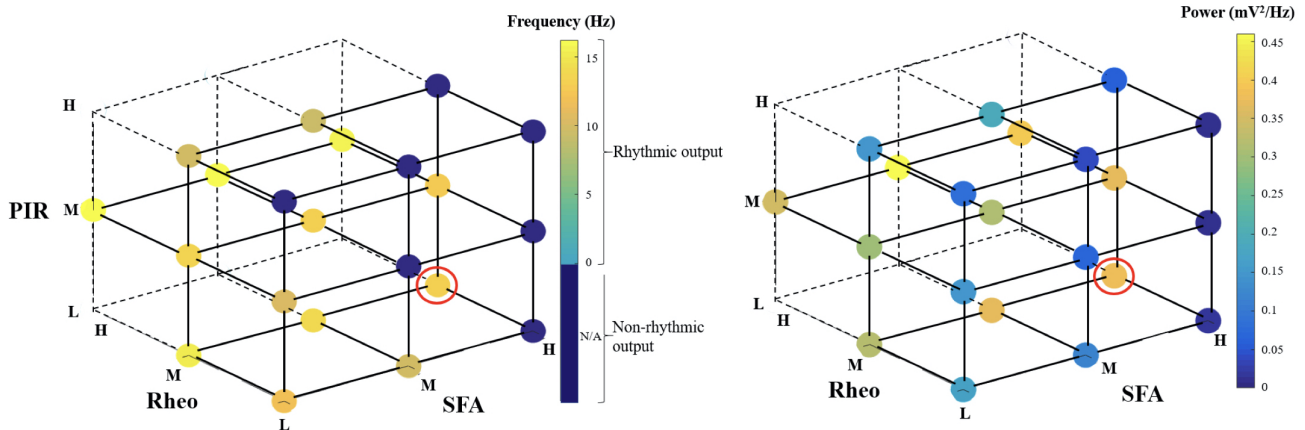

**Figure 3. Frequency and power of theta rhythms in heterogeneous E-I networks.**

Each dot represents the frequency (left) or power (right) of the output of the network that has [SFA,Rheo,PIR] features with a L, M or H range of values as plotted, with the dot color representing the specific frequency or power value given in the color bar. The red circled dot is the network that has feature values that include base values for all of the features, i.e., [SFA,Rheo,PIR]=HML. The dark blue circles do not produce a rhythmic output, and the vertices that do not have any dots are where there were no individual PYR cell models to generate the particular heterogeneous network. Further details are provided in the Appendix of the Supplementary Material.

110 For E-I networks with heterogeneous PYR cell populations that have PYR cells that *do* include SFA,  
111 Rheo *and* PIR base values, theta rhythms continue to be expressed. We also find that the network theta  
112 power is larger when there is a narrow rather than a broad range of values encompassing base ones. **Fig 2**  
113 shows the narrow and broad ranges of values in our created database. Further details are provided in  
114 the Appendix of the Supplementary Material. This observation of theta power difference suggests that  
115 particular quantified feature values affect the robustness of theta rhythms since the power is larger when it  
116 more narrowly encompasses base values.

117 For heterogeneous E-I networks that have PYR cells that do *not* include base values for all features, we  
118 build E-I networks that have a low (L), medium (M) or high (H) range of values for SFA, Rheo and PIR  
119 features in different combinations. Thus a given heterogeneous E-I network has a triplet of [SFA,Rheo,PIR]  
120 features that have a L, M or H range of values. These values are shown in **Fig 2**. In **Fig 3**, we show the  
121 frequency (left) and power (right) of the output of these heterogeneous E-I networks designated by dots of  
122 a given color. The red circled dot is the only E-I network that *does* have base values for all of the building  
123 block features, i.e., [SFA,Rheo,PIR]=HML. We observe the following for the network frequency: Networks  
124 with Rheo=L do not produce theta rhythms when PIR and SFA= M or H; There are no theta rhythms when  
125 Rheo=M values and SFA and PIR= H; As Rheo increases, the network frequency increases, and there  
126 appears to be a stronger control of frequency by the Rheo feature relative to SFA and PIR features. For  
127 the theta power, we find that it is lowest when Rheo=L and increases as Rheo increases, but decreases as  
128 SFA or PIR increase. However, when Rheo=M, the power increases as SFA increases and as PIR decreases.  
129 From these trends, it would appear that the Rheo feature controls the theta frequency and power more than  
130 SFA or PIR. As larger values of Rheo refer to larger depolarizing currents being required for the PYR  
131 cell to fire, our observations imply that the amount of current needed for a PYR cell to fire is an essential  
132 controller of theta frequency and power, assuming that other features allow rhythms to exist in the first  
133 place. Further details from this examination are provided in the Appendix of the Supplementary Material.

134 In summary, the exploration of our microcircuit model of theta rhythm generation in the whole  
135 hippocampus preparation leads us to the following conclusions regarding the influence of the three  
136 ‘building blocks’ on this dynamic: (i) a larger theta power occurs in E-I networks with heterogeneous  
137 PYR cells that include their base values and are narrowly distributed around them, and (ii) particular  
138 rheobase current values control the frequency and power of network rhythms more than the ability of the  
139 PYR cell to spike on inhibitory rebound or the particular amount of spike frequency adaptation. Thus,  
140 these simulations of E-I networks with heterogeneous PYR cell populations have allowed us to gauge the  
141 contributions of the different features and have helped us to confirm the robustness to cellular heterogeneity  
142 of the theta-generating rhythm mechanism in our microcircuit model design.

#### 4 USING THE ASSESSMENT AND DESIGN TO DEVELOP A HYPOTHESIS FOR THETA FREQUENCY CONTROL

143 As described above, we find that large, minimally connected recurrent networks with fast-firing PV+ cells  
144 and PYR cells can produce theta frequency population rhythms consistent with experiment, driven and  
145 controlled in part by the building block features of SFA, PIR and Rheo in PYR cells. In our previous I-cell  
146 only network models of PV+ cells, coherent network output was possible with experimentally constrained  
147 PV+ cellular models and synaptic connectivities (Ferguson et al., 2013). In creating the E-I network  
148 model setup, the PV+ cell network was ‘designed’ to be in a coherent state - a function of the appropriate  
149 excitatory drive being received and the connectivity of PV+ cells. Specifically, we chose the synaptic  
150 weight (between PV+ cells) to be such that it could be at the ‘edge’ of firing coherently (high frequency)  
151 or not (see Fig. 3 in Ferguson et al. (2013)), and as such, given an appropriate excitatory drive from the  
152 PYR cells, the PV+ cell network could be in a high frequency coherent regime and be considered to be  
153 producing an inhibitory ‘bolus’ to the PYR cells. This is an important consideration for our phase response  
154 curve (PRC) considerations below.

155 From the several model sets of heterogeneous E-I model network outputs described in the previous  
156 section, we choose three that exhibit strong population rhythms of different frequencies. Details on these  
157 three chosen networks (specifically the heterogeneous PYR population as well as the classification of their  
158 rhythms as ‘strong’) can be found in the Appendix of the Supplementary Material. Raster plot outputs  
159 of the PYR cells in these chosen heterogeneous E-I networks are shown in **Fig 4** where the different  
160 rhythms are referred to as ‘slow’, ‘medium’ and ‘fast’. Given the minimal nature of the microcircuit model,  
161 the frequencies of these rhythms fall a bit outside theta ranges (higher) for some networks, although the  
162 underlying theta generation mechanism and the model design is the same.

163 Let us now take advantage of our microcircuit design to examine how these frequencies are controlled by  
164 turning to PRC considerations (Schultheiss et al., 2011). We note that while PRCs are commonly calculated  
165 using a brief, strong, excitatory current pulse as a perturbation, we slightly modify that paradigm here  
166 and instead use a negative pulse whose amplitude and duration is motivated by the type of synaptic inputs  
167 generated during an ‘inhibitory bolus’ in our network model (see **Fig 5**). We know that the PYR cell  
168 network can generate theta population bursts on its own given its cellular adaptation characteristics (SFA  
169 feature) (Ferguson et al., 2015b). While on their own the PYR cells do not fire sparsely as in experiment,  
170 they do when a PV+ cell population is included (Ferguson et al., 2017). We consider that the resulting  
171 frequency of the E-I network’s population bursts is due to a combination of the individual PYR cell’s firing  
172 frequency and how much an inhibitory input could advance or delay the PYR cell spiking (as quantified by  
173 PRCs). The setup to consider this is schematized in **Fig 5** and consists of the following: Each PYR cell in  
174 the heterogeneous population receives excitatory input from other PYR cells as well as a noisy drive (other

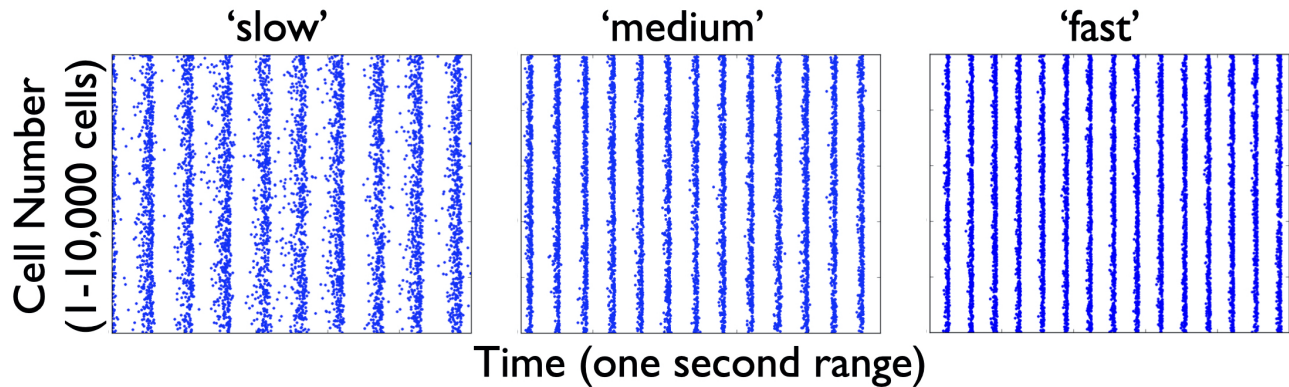

**Figure 4. Raster plot outputs of PYR cells from three heterogeneous E-I simulations.**

These three model sets generating population burst rhythmic output exhibit three different frequencies that we refer to as ‘slow’ (9.6 Hz), ‘medium’ (13 Hz) and ‘fast’ (15 Hz) from their respective model sets. For all three sets, the heterogeneous PYR cells include those with Rheo base values, whereas only the model set producing the ‘medium’ output has PYR cells with SFA base values. Except for the model set producing ‘slow’ output, PYR cells have PIR base values. That is, the triplet [SFA,Rheo,PIR] feature for the slow, medium and fast networks are MMH, HML and LML respectively.

175 input). The amount of input a PYR cell receives would of course fluctuate over time, but under reasonable  
176 approximation the PYR cell receives a mean excitatory input of about 20 to 30 pA. This approximation  
177 is based on the fact that in our E-I network models (see **Fig 1**), theta population bursts occur when PYR  
178 cells receive a zero mean excitatory drive with fluctuations of  $\approx 10\text{-}30$  pA (Ferguson et al., 2017). We then  
179 calculate PRCs as described above. The inhibitory pulse can advance or delay the subsequent PYR cell’s  
180 spike as quantified by the PRC, which in turn is dependent on the PYR cell’s intrinsic properties. All of  
181 these aspects are schematized in **Fig 5**.

182 We consider the three cases of heterogeneous E-I networks exhibiting different population burst  
183 frequencies shown in **Fig 4** and described as having a ‘slow’, ‘medium’ or ‘fast’ population burst frequency  
184 output. We generate PRCs for the several PYR cell models in the population for each of these model sets  
185 that produce the different frequency population burst outputs. Each PYR cell model in the heterogeneous  
186 population has particular PRC characteristics due to its given model parameter values, and thus exhibits a  
187 specific intrinsic frequency for a given input.

#### 188 4.1 PRC calculations

189 These proceed as follows: A set input current (20:2:30 pA) is tonically applied to the model cell, and  
190 the period (defined  $\lambda$ ) of the cell’s firing is calculated as the time between the ninth and 10th cell spike.  
191 The inverse of the period represents the firing frequency of the cell, reported as averages and standard  
192 deviations for entire model sets. We compute the phase response of a model neuron to a perturbation at 100  
193 equidistant times in its normal firing cycle, where the perturbation is a 1 ms current pulse with -500 pA  
194 amplitude (as mentioned previously, considered an approximation of the synaptic input received by these  
195 cells following an ‘inhibitory bolus’). For  $1 \leq i \leq 100$ , we define  $\Delta p = \frac{\lambda}{100}$  and deliver the perturbation  
196 at  $i * \Delta p$  ms after the 10th cell spike. We then measure the time between the 10th and 11th cell spike as the  
197 “perturbed period” (defined  $\lambda_p$ ). We calculate the difference between this and the previously calculated  
198 period (in the absence of any perturbation) and normalize this by the normal firing period, meaning that in  
199 the PRC plots the y-axis is  $\frac{\lambda - \lambda_p}{\lambda}$ . This means that negative values plotted in the PRC correspond with a

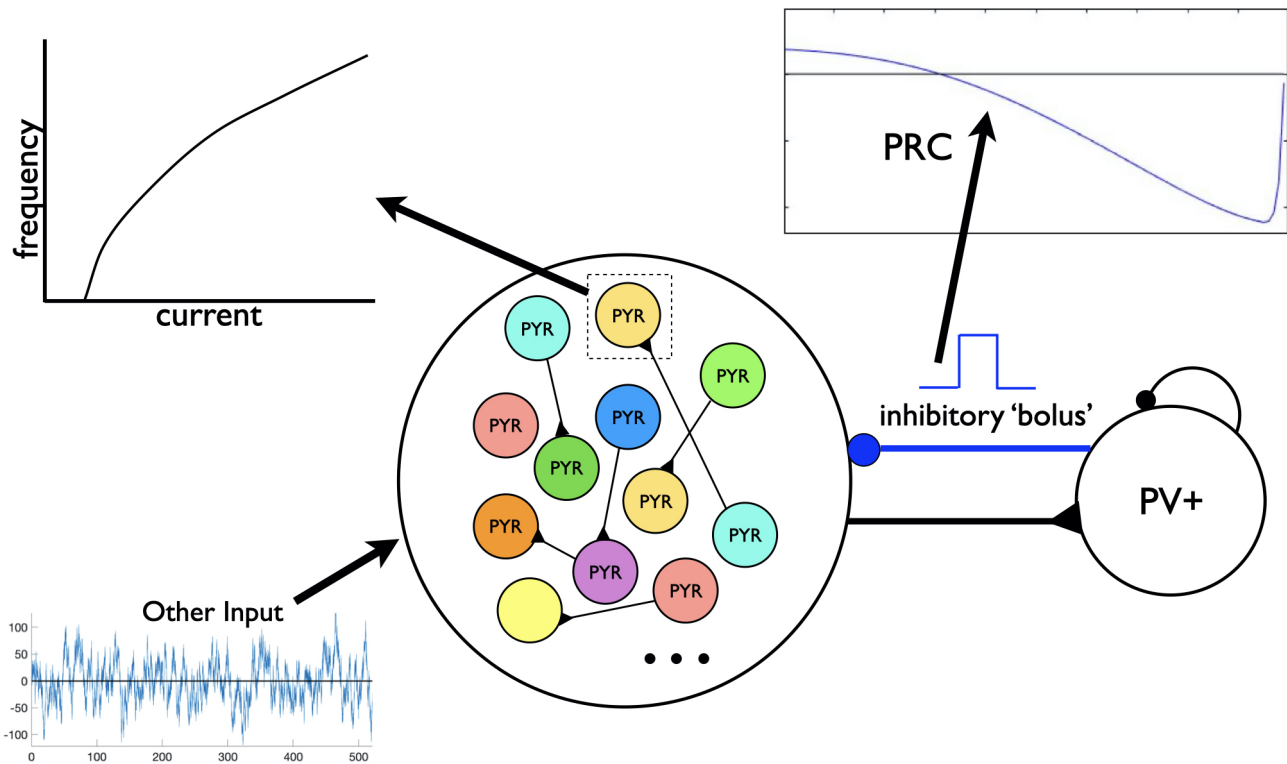

**Figure 5. Schematic of setup for phase response curve (PRC) calculations.**

Assuming a theta-generating mechanism based on model design, PRCs are generated based on an inhibitory input ('bolus') coming from the PV+ cell network to a PYR cell in the PYR cell network. Each PYR cell is receiving a noisy drive shown as 'Other Input', and an illustrative f-I curve is shown for one of the PYR cells. An illustration of a computed PRC based on the inhibitory input to a particular PYR cell is also shown. It would be dependent on the particular PYR cell's model parameter values that dictates its f-I curve.

200 phase-delay, i.e. the perturbed period was longer than the unperturbed period, and vice-versa. The x-axis in  
201 the PRC plots are the normalized time at which the perturbation was delivered, simply calculated as  $\frac{i}{100}$ .  
202 We note that we perform this calculation separately for each  $i$ , i.e. we re-initialize the cell and let it respond  
203 naturally to a tonic input until the 10th spike for each value of  $i$ , rather than perform these perturbations  
204 sequentially and risk confounding the responses.

205 In **Fig 6B** and **C** we quantify aspects of the PRC curves. In **Fig 6B** we simply extract the value of the  
206 normalized phase difference from the mean PRC curve for a perturbation delivered at a normalized phase  
207 of 0.3 (denoted by the arrows overlaid on **Fig 6A**). In **Fig 6C**, we quantify one aspect of the mean PRC  
208 curve's rate of change, specifically the variability of the difference quotient calculated at each phase step,  
209 in the following straightforward way: first, this difference quotient is calculated for all but the last value  
210 of the normalized phase; second, the variance of these data is calculated simply using the *var* function in  
211 MATLAB.

212 The code for generating and plotting these PRCs can be found at [https://github.com/sbrich/](https://github.com/sbrich/Theta_PRCs)  
213 *Theta\_PRCs*. PRCs for input currents other than 20 pA that is shown in **Fig 6A** can be found at  
214 <https://osf.io/yrkfv/>.



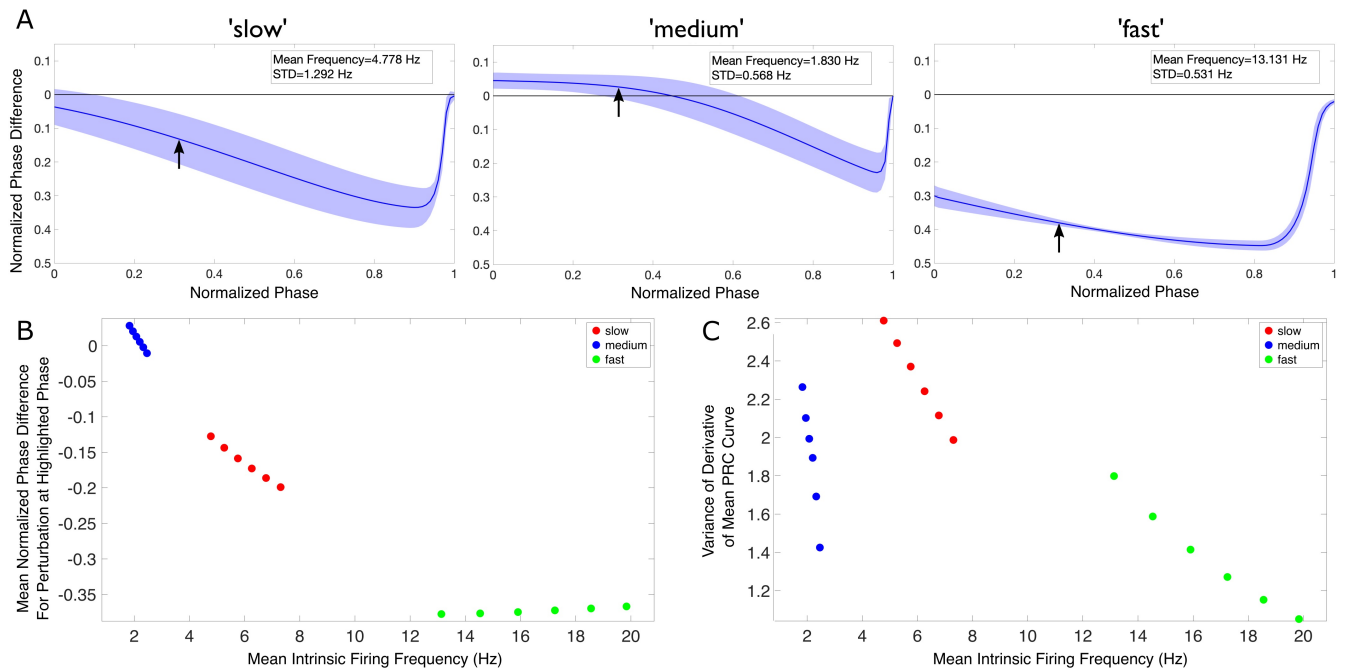

**Figure 6. Theta rhythm frequency is influenced by inhibitory drive as quantified via PRCs and firing frequencies of individual PYR cells.**

(A) Mean PRC (solid line) for the heterogeneous PYR cell population involved in ‘slow’ (left), ‘medium’ (middle), and ‘fast’ (right) theta oscillations, calculated with an input current of 20 pA and with the shading representing  $\pm$  the standard deviation. There are 25, 556 and 74 different PYR cell models in the 10,000 PYR cell populations of slow, medium and fast cases respectively. More details are provided in the Appendix of the Supplementary Material. The mean and standard deviation of the firing frequencies of the PYR cells at this input level are included in the inset of each panel. (B-C) After calculating both the mean PRC and mean intrinsic firing frequency for the PYR cell populations associated with our ‘slow’ (red), ‘medium’ (blue), and ‘fast’ (green) theta oscillations for six input currents (20:2:30 pA), we extract a particular feature of the mean PRC (the mean phase shift caused by a perturbation delivered at a phase of 0.3 in panel B and the variance of the mean PRC’s derivative in panel C) and plot it against the mean intrinsic firing frequency. In neither case is there a linear relationship between either axis and the theta rhythm frequency, indicating that it is a more complex combination that determines the population frequency. Note that, given the monotonic relationship between the input current and firing frequency in this range, the leftmost point for each color represents an input current of 20 pA, with each subsequent point moving rightwards representing the next input current step.

## 215 4.2 Observations

216 In Fig 6 we first show an example of PRCs calculated for an input current of 20 pA (Fig 6A). PRCs are  
217 calculated for each model in a particular model set of heterogeneous PYR cell models, with the averaged  
218 curve presented along with a range of  $\pm$  one standard deviation (shown by the shading around the curve in  
219 each plot of Fig 6A). These PRCs showcase distinct features: for instance, the PYR cells in the medium  
220 case uniquely exhibit a region of phase-advance, while the PYR cells in the fast case have the largest phase  
221 delay for perturbations delivered at all but the latest phases. Clear distinctions between the PRCs for each  
222 model set persist for all the input currents used.

223 To better visualize the influence of the intrinsic properties of the PYR neurons on theta rhythm frequency,  
224 we plot an extracted feature of the mean PRC against the mean firing frequency of these model sets for  
225 each of our computed input currents in Fig 6B and C, with the corresponding theta rhythm frequencies  
226 associated with each model set denoted by the data point’s color, with the extracted PRC features in

227 each case described in the previous section. These visualizations clearly illustrate that *both* the PRC and  
228 the mean intrinsic firing frequency of the PYR neurons in a given model set contribute to the overall  
229 theta rhythm frequency; otherwise, these points would be “flat” with respect to either the x or y axis.  
230 Furthermore, the relationship between the extracted PRC feature of interest and the mean intrinsic firing  
231 frequency varies notably depending on the output theta rhythm frequency: for instance, in **Fig 6B** both the  
232 ‘slow’ and ‘medium’ model sets show a monotonically decreasing relationship between the extracted PRC  
233 value and the mean intrinsic firing frequency, while the ‘fast’ model set shows a monotonically increasing  
234 relationship. Taken together, these results show that it is a combination of the inhibitory drive and the PYR  
235 cell’s excitability that contributes to the overall theta rhythm frequency.

236 The intrinsic properties quantified by the PRCs help articulate potential mechanisms by which these  
237 differing theta rhythm frequencies arise. For instance, while the PYR cells in the fast case have the fastest  
238 individual firing frequencies (notably faster than what is seen in population models), their PRCs may be  
239 illustrative of how the inhibitory ‘bolus’ decreases this firing frequency towards the theta range. Meanwhile,  
240 the PYR cells in the medium case have the slowest individual firing frequencies, although they participate  
241 in ‘medium’ theta rhythm frequencies. The PRC in this case, particularly the region of phase-advance, may  
242 elucidate how inhibitory synaptic input actually accelerates PYR cell activity. These particular examples  
243 rely upon the PRC feature extracted and plotted in **Fig 6B**.

244 This analysis of the PRC features of our model sets supports our hypothesis that the frequency of the  
245 network population bursts are due to a combination of the inputs that the PYR cells receive and the intrinsic  
246 properties of those cells dictating their responses to said inputs. The cells’ response to excitatory drive is  
247 quantified in part by the mean intrinsic firing frequency of the model sets, while their response to inhibitory  
248 drive is quantified by the properties of the computed PRCs. However, this is all in the context of being able  
249 to have a stable population burst in the first place, as given by our model design with SFA, PIR and Rheo  
250 features: our models include a PYR cell population that can generate theta frequency population bursts on  
251 its own, with the PV+ cell population serving to facilitate sparse PYR cell firing. The PRC calculations  
252 here show that an appropriate inhibitory input contributes to the resulting population burst frequency.

## 5 DISCUSSION

253 Several models of theta rhythms have been developed (Ferguson and Skinner, 2018; Kopell et al., 2010), but  
254 they have not specifically looked at theta frequency control as coupled with its generation in an experimental  
255 context. Here, we have used a microcircuit model, as designed to generate theta rhythms representing those  
256 observed in a whole hippocampus preparation, to develop a hypothesis for theta frequency control. Our  
257 work has allowed us to propose a hypothesis for theta frequency rhythm control that encompasses two  
258 aspects: (i) an internal mechanism that stems from SFA, PIR and Rheo building block features of PYR  
259 cells; (ii) an external mechanism that involves an ‘inhibition-based tuning’ of PYR cell firing. From our  
260 previous work we already knew that minimally connected PYR cell networks produced theta frequency  
261 population bursts on their own (Ferguson et al., 2015b), but the majority of the PYR cells would fire during  
262 population theta bursts which is unlike the experimental observations of sparse PYR cell firing. With the  
263 inclusion of PV+ cells to create E-I networks, the population of PYR cells fired sparsely in accordance  
264 with experiment. It makes sense that the addition of inhibitory cells leads to less firing of PYR cells due  
265 to potential silencing from the inhibition. That theta rhythms of strong power can still emerge despite  
266 the participation of fewer PYR cells in the rhythm is likely due to the PV+ cells tuning the otherwise  
267 diverse frequencies of the PYR cells to similar frequencies, enabling this smaller group of cells to produce  
268 strong rhythms. This constitutes a main part of our proposed hypothesis. Relatedly, it has been shown that

269 feedforward inhibition plays a role in maintaining low levels of correlated variability of spiking activity  
270 (Middleton et al., 2012).

271 It is important to highlight two key aspects that underlie our proposed hypothesis. First, the PYR cell  
272 population needs to be large enough so that it can collectively generate a strong excitatory drive to the  
273 inhibitory PV+ cells, and in turn the PV+ cell population should be able to fire enough (and coherently) to  
274 create a strong inhibitory ‘bolus’ to tune the PYR cell population output. Second, the net input (recurrent  
275 excitation, excitatory drive, incoming inhibition) received by the PYR cells leads to the generation of  
276 theta rhythms and its resultant frequency. It is interesting to note that similarities exist between these key  
277 aspects and the “PING mechanism” underlying the generation of gamma rhythms in E-I networks (Kopell  
278 et al., 2010; ter Wal and Tiesinga, 2013), especially considering recent research showing that rhythms with  
279 frequencies approaching the theta range can arise in PING-motivated networks (Rich et al., 2017).

280 We do not know whether a clear relationship between PYR cell inputs and network frequency as described  
281 in the second key aspect above actually exists, and it would be highly challenging to directly examine this  
282 experimentally. However, it is possible to use detailed, biophysical network models to explore this and  
283 gain biological insights. We have done this by bringing together the described microcircuit model used  
284 herein and a detailed, full-scale CA1 microcircuit model (Bezaire et al., 2016), and examining how the  
285 theta network frequency produced by the detailed model depends on the net input received by the PYR  
286 cells (Chatzikalymniou et al., 2020). We found that the biologically detailed models strongly support this  
287 dependence and thus our proposed hypothesis for theta rhythm frequency control. Thus, this indicates that  
288 theta frequencies in the biological system may be controlled in such a fashion.

289 In the previous work of Ferguson et al. (2015a), we had created PYR cell models that were either strongly  
290 adapting based on fits to the experimental data, or weakly adapting based on another experimental dataset.  
291 In Ferguson et al. (2015b), when either PYR cell models were used in E-cell only networks, that could  
292 produce theta frequency population bursts. As discussed in Ferguson et al. (2015a), it is unlikely that there  
293 are distinct types of biological PYR cells that are strongly or weakly adapting, but rather a continuum  
294 of adaptation amount dependent on the underlying balances of biophysical ion channel currents. Our  
295 explorations of the robustness of the theta generation mechanism in the microcircuit model here revealed  
296 that the frequency and power of theta rhythms were not strongly controlled by SFA feature values relative  
297 to Rheo feature values. Thus, although we created the model database starting from the strongly adapting  
298 PYR cell model parameter basis, it likely would not have mattered if the robustness examination of theta  
299 rhythm generation had been undertaken using weakly adapting PYR cell models instead.

300 It is perhaps not surprising that Rheo feature values are the main controller of the existence of theta  
301 rhythms and their frequency and power, as the particular Rheo value dictates whether a PYR cell would  
302 spike or not. We note that the experimental findings of Goutagny et al. (2009) had already suggested the  
303 importance of PIR in the generation of theta rhythms. In actual CA1 PYR cells, it has been shown that PIR  
304 spiking does occur, mediated by h-channels, and is locally controlled by biophysical ion channel balances  
305 (Ascoli et al., 2010). Whether PYR cells actually fire due to PIR during ongoing theta rhythms may or  
306 may not be the case, and one could potentially disentangle this in the models. However, the hypothesis  
307 developed in this work points to a confluence of features that culminate in the net current to individual  
308 PYR cells being a focus of theta rhythm frequency control. Thus, changes in the net drive to PYR cells or  
309 changes to the PYR cell’s intrinsic properties such as h-currents that would affect PIR would be expected  
310 to affect the resulting theta rhythm frequency.

311 PRC theory has been used in a variety of ways in the Neuroscience field (Schultheiss et al., 2011),  
312 and particularly in consideration of network dynamics. For example, Hansel et al. (1995) used PRCs  
313 to explain the differential capacity for excitatory drive to synchronize networks of Type I or Type II  
314 neurons (these types are differentiated by their bifurcation type (Izhikevich, 2006)), Rich et al. (2016)  
315 analyzed synchronization features in purely inhibitory networks using PRCs, and Achuthan and Canavier  
316 (2009) used PRCs to understand clustering in networks. We took advantage of PRC theory by considering  
317 phase-resetting of the PYR cells due to incoming inhibitory input. In this way, we were able to hypothesize  
318 an inhibition-based tuning mechanism for control of the theta rhythm frequency based on the PRC shape  
319 (amount of advance or delay) and the PYR cell's intrinsic firing frequency. Our use of PRCs relied on  
320 our observations of the effect of different PRC shapes on the resulting theta rhythm. For example, such  
321 a consideration was used by Rich et al. (2016) to explain differential synchrony patterns in inhibitory  
322 networks of Type I vs Type II neurons.

323 In conclusion, we have developed a hypothesis for how theta rhythm frequencies are controlled in the  
324 CA1 hippocampus. This hypothesis is built on the theta-generating mechanism of the microcircuit model  
325 design. Even though it does not include all of the known inhibitory cell types, it perhaps captures essential  
326 elements in play in biological circuits and may apply more widely in the brain regarding the generation and  
327 control of theta rhythm frequencies.

## CONFLICT OF INTEREST STATEMENT

328 The authors declare that the research was conducted in the absence of any commercial or financial  
329 relationships that could be construed as a potential conflict of interest.

## AUTHOR CONTRIBUTIONS

330 FS, JL, AC contributed to conception and supervision of the study. SR, AL performed computations and  
331 analyses. FS wrote the first draft of the manuscript. SR wrote sections of the manuscript. All authors  
332 contributed to manuscript revision, read, and approved the submitted version.

## FUNDING

333 This work was supported by the Natural Sciences and Engineering Research Council of Canada (NSERC)  
334 Discovery Grant RGPIN-2016-06182 (FKS).

## ACKNOWLEDGMENTS

335 Parts of this work have been released as a preprint (Chatzikalymniou et al., 2020).

## SUPPLEMENTAL DATA

336 There is a supplementary file referred to as the Appendix in the main text.

## DATA AVAILABILITY STATEMENT

337 Additional datasets generated by this study that are not present here or in the Appendix (Supplementary  
338 Material) can be found at <https://osf.io/yrkfv/>.

## REFERENCES

339 Achuthan, S. and Canavier, C. C. (2009). Phase-resetting curves determine synchronization, phase locking,  
340 and clustering in networks of neural oscillators. *Journal of Neuroscience* 29, 5218–5233

- 341 Ascoli, G. A., Gasparini, S., Medinilla, V., and Migliore, M. (2010). Local Control of Postinhibitory  
342 Rebound Spiking in CA1 Pyramidal Neuron Dendrites. *The Journal of Neuroscience* 30, 6434–6442.  
343 doi:10.1523/JNEUROSCI.4066-09.2010
- 344 Bezaire, M. J., Raikov, I., Burk, K., Vyas, D., and Soltesz, I. (2016). Interneuronal mechanisms  
345 of hippocampal theta oscillation in a full-scale model of the rodent CA1 circuit. *eLife* 5, e18566.  
346 doi:10.7554/eLife.18566
- 347 Bland, B. H. (1986). The physiology and pharmacology of hippocampal formation theta rhythms. *Progress*  
348 *in Neurobiology* 26, 1–54. doi:10.1016/0301-0082(86)90019-5
- 349 Buzsáki, G. (2002). Theta oscillations in the hippocampus. *Neuron* 33, 325–340
- 350 Chatzikalymniou, A. P., Gumus, M., Lunyov, A. R., Rich, S., Lefebvre, J., and Skinner, F. K. (2020).  
351 Linking minimal and detailed models of CA1 microcircuits reveals how theta rhythms emerge and how  
352 their frequencies are controlled. *bioRxiv*, 2020.07.28.225557doi:10.1101/2020.07.28.225557. Publisher:  
353 Cold Spring Harbor Laboratory Section: New Results
- 354 Colgin, L. L. (2013). Mechanisms and Functions of Theta Rhythms. *Annual Review of Neuroscience* 36,  
355 295–312. doi:10.1146/annurev-neuro-062012-170330
- 356 Colgin, L. L. (2016). Rhythms of the hippocampal network. *Nature Reviews Neuroscience* 17, 239–249.  
357 doi:10.1038/nrn.2016.21
- 358 Ferguson, K. A., Chatzikalymniou, A. P., and Skinner, F. K. (2017). Combining Theory, Model, and  
359 Experiment to Explain How Intrinsic Theta Rhythms Are Generated in an In Vitro Whole Hippocampus  
360 Preparation without Oscillatory Inputs. *eNeuro* 4. doi:10.1523/ENEURO.0131-17.2017
- 361 Ferguson, K. A., Huh, C. Y. L., Amilhon, B., Williams, S., and Skinner, F. K. (2013). Experimentally  
362 constrained CA1 fast-firing parvalbumin-positive interneuron network models exhibit sharp transitions  
363 into coherent high frequency rhythms. *Frontiers in computational neuroscience* 7, 144. doi:10.3389/  
364 fncom.2013.00144
- 365 Ferguson, K. A., Huh, C. Y. L., Amilhon, B., Williams, S., and Skinner, F. K. (2015a). Simple, biologically-  
366 constrained CA1 pyramidal cell models using an intact, whole hippocampus context. *F1000Research*  
367 doi:10.12688/f1000research.3894.2
- 368 Ferguson, K. A., Njap, F., Nicola, W., Skinner, F. K., and Campbell, S. A. (2015b). Examining the limits of  
369 cellular adaptation bursting mechanisms in biologically-based excitatory networks of the hippocampus.  
370 *Journal of Computational Neuroscience* 39, 289–309. doi:10.1007/s10827-015-0577-1
- 371 Ferguson, K. A. and Skinner, F. K. (2018). Hippocampal Theta, Gamma, and Theta/Gamma Network  
372 Models. In *Encyclopedia of Computational Neuroscience*, eds. D. Jaeger and R. Jung (New York, NY:  
373 Springer New York). 1–14. doi:10.1007/978-1-4614-7320-6\_27-2
- 374 Gjorgjieva, J., Drion, G., and Marder, E. (2016). Computational implications of biophysical diversity and  
375 multiple timescales in neurons and synapses for circuit performance. *Current Opinion in Neurobiology*  
376 37, 44–52. doi:10.1016/j.conb.2015.12.008
- 377 Goutagny, R., Jackson, J., and Williams, S. (2009). Self-generated theta oscillations in the hippocampus.  
378 *Nature Neuroscience* 12, 1491–1493. doi:10.1038/nn.2440
- 379 Hansel, D., Mato, G., and Meunier, C. (1995). Synchrony in excitatory neural networks. *Neural Comput* 7,  
380 307–337
- 381 Hinman, J. R., Dannenberg, H., Alexander, A. S., and Hasselmo, M. E. (2018). Neural mechanisms of  
382 navigation involving interactions of cortical and subcortical structures. *Journal of Neurophysiology* 119,  
383 2007–2029. doi:10.1152/jn.00498.2017
- 384 Huh, C. Y. L., Amilhon, B., Ferguson, K. A., Manseau, F., Torres-Platas, S. G., Peach, J. P., et al. (2016).  
385 Excitatory Inputs Determine Phase-Locking Strength and Spike-Timing of CA1 Stratum Oriens/Alveus

- 386 Parvalbumin and Somatostatin Interneurons during Intrinsically Generated Hippocampal Theta Rhythm.  
387 *The Journal of Neuroscience* 36, 6605–6622. doi:10.1523/JNEUROSCI.3951-13.2016
- 388 Izhikevich, E. M. (2006). *Dynamical Systems in Neuroscience: The Geometry of Excitability and Bursting*  
389 (The MIT Press), 1 edn.
- 390 Jacobs, J. (2014). Hippocampal theta oscillations are slower in humans than in rodents: implications for  
391 models of spatial navigation and memory. *Philosophical Transactions of the Royal Society of London B:*  
392 *Biological Sciences* 369, 20130304. doi:10.1098/rstb.2013.0304
- 393 Kopell, N., Börgers, C., Pervouchine, D., Malerba, P., and Tort, A. (2010). Gamma and theta rhythms  
394 in biophysical models of hippocampal circuits. In *Hippocampal Microcircuits*, eds. V. Cutsuridis,  
395 B. Graham, S. Cobb, and I. Vida (Springer New York), Springer Series in Computational Neuroscience.  
396 423–457
- 397 Kota, S., Rugg, M. D., and Lega, B. C. (2020). Hippocampal Theta Oscillations Support Successful  
398 Associative Memory Formation. *Journal of Neuroscience* 40, 9507–9518. doi:10.1523/JNEUROSCI.  
399 0767-20.2020. Publisher: Society for Neuroscience Section: Research Articles
- 400 Kramis, R., Vanderwolf, C. H., and Bland, B. H. (1975). Two types of hippocampal rhythmical slow  
401 activity in both the rabbit and the rat: Relations to behavior and effects of atropine, diethyl ether, urethane,  
402 and pentobarbital. *Experimental Neurology* 49, 58–85. doi:10.1016/0014-4886(75)90195-8
- 403 McCormick, D. A., McGinley, M. J., and Salkoff, D. B. (2015). Brain state dependent activity in the cortex  
404 and thalamus. *Current Opinion in Neurobiology* 31, 133–140. doi:10.1016/j.conb.2014.10.003
- 405 Middleton, J. W., Omar, C., Doiron, B., and Simons, D. J. (2012). Neural Correlation Is Stimulus  
406 Modulated by Feedforward Inhibitory Circuitry. *Journal of Neuroscience* 32, 506–518. doi:10.1523/  
407 JNEUROSCI.3474-11.2012. Publisher: Society for Neuroscience Section: Articles
- 408 Mikulovic, S., Restrepo, C. E., Siwani, S., Bauer, P., Pupe, S., Tort, A. B. L., et al. (2018). Ventral  
409 hippocampal OLM cells control type 2 theta oscillations and response to predator odor. *Nature*  
410 *Communications* 9, 3638. doi:10.1038/s41467-018-05907-w
- 411 Rich, S., Booth, V., and Zochowski, M. (2016). Intrinsic cellular properties and connectivity density  
412 determine variable clustering patterns in randomly connected inhibitory neural networks. *Frontiers in*  
413 *neural circuits* 10, 82
- 414 Rich, S., Zochowski, M., and Booth, V. (2017). Dichotomous dynamics in ei networks with strongly and  
415 weakly intra-connected inhibitory neurons. *Frontiers in neural circuits* 11, 104
- 416 Schultheiss, N., Butera, R., and Prinz, A. (2011). *Phase Response Curves in Neuroscience: Theory,*  
417 *Experiment, and Analysis* (Springer)
- 418 Tendler, A. and Wagner, S. (2015). Different types of theta rhythmicity are induced by social and fearful  
419 stimuli in a network associated with social memory. *eLife* 4, e03614. doi:10.7554/eLife.03614
- 420 ter Wal, M. and Tiesinga, P. (2013). Hippocampal Oscillations, Mechanisms (PING, ING, Sparse). In  
421 *Encyclopedia of Computational Neuroscience*, eds. D. Jaeger and R. Jung (New York, NY: Springer New  
422 York). 1–14. doi:10.1007/978-1-4614-7320-6\_475-3

## FIGURE CAPTIONS

423 **Figure 1. Schematic showing aspects involved in the hypothesis developed in this study.**

424 Theta rhythms are generated intrinsically in a whole hippocampus preparation of Goutagny et al. (2009)  
425 ('Experiment'). Their generation is captured in a microcircuit model design by Ferguson et al. (2017)  
426 ('Model Networks'). In the present paper we assess the robustness of this model design and develop a  
427 hypothesis for theta frequency control ('Hypothesis Development').

428 **Figure 2. Distributions of PYR cell features from created model database.**

429 A heterogeneous set of PYR cells was created and their 'building block' features of SFA, Rheo and  
430 PIR were quantified. Details of this quantification are provided in the Appendix of the Supplementary  
431 Material. Histograms show the number of occurrences of SFA [=] Hz/pA, Rheo [=] pA, PIR [=] pA values,  
432 and vertical black arrows indicate [SFA,Rheo,PIR] base values. Also shown are narrow (N) and broad  
433 (B) subsets of heterogeneous PYR cell populations and low (L), medium (M) or high (H) subsets of  
434 heterogeneous PYR cell populations that do or do not include base building block values. SFA histogram  
435 has a bin resolution of 0.05, and Rheo, PIR histograms have a bin resolution of 0.5.

436 **Figure 3. Frequency and power of theta rhythms in heterogeneous E-I networks.**

437 Each dot represents the frequency (left) or power (right) of the output of the network that has  
438 [SFA,Rheo,PIR] features with a L, M or H range of values as plotted, with the dot color representing the  
439 specific frequency or power value given in the color bar. The red circled dot is the network that has feature  
440 values that include base values for all of the features, i.e., [SFA,Rheo,PIR]=HML. The dark blue circles  
441 do not produce a rhythmic output, and the vertices that do not have any dots are where there were no  
442 individual PYR cell models to generate the particular heterogeneous network. Further details are provided  
443 in the Appendix of the Supplementary Material.

444 **Figure 4. Raster plot outputs of PYR cells from three heterogeneous E-I simulations.**

445 These three model sets generating population burst rhythmic output exhibit three different frequencies that  
446 we refer to as 'slow' (9.6 Hz), 'medium' (13 Hz) and 'fast' (15 Hz) from their respective model sets. For all  
447 three sets, the heterogeneous PYR cells include those with Rheo base values, whereas only the model set  
448 producing the 'medium' output has PYR cells with SFA base values. Except for the model set producing  
449 'slow' output, PYR cells have PIR base values. That is, the triplet [SFA,Rheo,PIR] feature for the slow,  
450 medium and fast networks are MMH, HML and LML respectively.

451 **Figure 5. Schematic of setup for phase response curve (PRC) calculations.**

452 Assuming a theta-generating mechanism based on model design, PRCs are generated based on an inhibitory  
453 input ('bolus') coming from the PV+ cell network to a PYR cell in the PYR cell network. Each PYR cell is  
454 receiving a noisy drive shown as 'Other Input', and an illustrative f-I curve is shown for one of the PYR  
455 cells. An illustration of a computed PRC based on the inhibitory input to a particular PYR cell is also  
456 shown. It would be dependent on the particular PYR cell's model parameter values that dictates its f-I  
457 curve.

458 **Figure 6. Theta rhythm frequency is influenced by inhibitory drive as quantified via PRCs and  
459 firing frequencies of individual PYR cells.**

460 (A) Mean PRC (solid line) for the heterogeneous PYR cell population involved in 'slow' (left), 'medium'  
461 (middle), and 'fast' (right) theta oscillations, calculated with an input current of 20 pA and with the  
462 shading representing  $\pm$  the standard deviation. There are 25, 556 and 74 different PYR cell models in the  
463 10,000 PYR cell populations of slow, medium and fast cases respectively. More details are provided in the  
464 Appendix of the Supplementary Material. The mean and standard deviation of the firing frequencies of

465 the PYR cells at this input level are included in the inset of each panel. **(B-C)** After calculating both the  
466 mean PRC and mean intrinsic firing frequency for the PYR cell populations associated with our ‘slow’  
467 (red), ‘medium’ (blue), and ‘fast’ (green) theta oscillations for six input currents (20:2:30 pA), we extract a  
468 particular feature of the mean PRC (the mean phase shift caused by a perturbation delivered at a phase of 0.3  
469 in panel **B** and the variance of the mean PRC’s derivative in panel **C**) and plot it against the mean intrinsic  
470 firing frequency. In neither case is there a linear relationship between either axis and the theta rhythm  
471 frequency, indicating that it is a more complex combination that determines the population frequency. Note  
472 that, given the monotonic relationship between the input current and firing frequency in this range, the  
473 leftmost point for each color represents an input current of 20 pA, with each subsequent point moving  
474 rightwards representing the next input current step.
